# Supplementary material
Source: MDPI journal article supplement (https://www.mdpi.com/2304-6732/11/5/471)

## SUPPLEMENT MATERIAL

**TITLE:** Mechanical assessment in atherosclerosis based on photoacoustic viscoelasticity imaging

**AUTHORS:** Xingchao Zhang <sup>1</sup>, Xiaohan Shi <sup>2</sup>, Hui Wu <sup>1</sup>, Caixun Bai <sup>1</sup>, Junshan Xiu <sup>1,\*</sup> and Yue Zhao <sup>1,\*</sup>

---

### Supplemental Methods

*Phantom Experiments.* The first phantom was utilized to assess the resolution of the system. A blade was embedded in a gelatin (48722; Sigma-Aldrich) phantom. The sample was imaged via PAVEI and the viscosity-elasticity ratio distribution on the edge was shown in Online Figure 1. The full-width-at-half-maximum (FWHM) of the signal line spread function (LSF) was calculated. The system had an approximate 65  $\mu\text{m}$  transverse resolution.

Online Figure 2 shows the PA amplitude and phase delay of four samples marked with “a”, “b”, “c” and “d” contained gelatin with the concentration of 4%, 4%, 7%, 7% respectively. The samples “b” and “d” were interfused of ink with proportion of 4% and 8%, and their absorption coefficients are 1.15  $\text{cm}^{-1}$  and 1.79  $\text{cm}^{-1}$  respectively estimated by the UV-Vis spectrometer (Lamda 35, PE, USA).

**2D PAVEI.** Fifteen Apolipoprotein E-knockout mice (C57BL/6 background; Guangdong Province Medicine Laboratory Animal Center, China) were euthanized with an overdose of pentobarbital (3%, 120 mg/kg). The thoracic aortas were harvested and further examined with PAVEI. Saline was inserted into the aortic lumen for ultrasonic signal coupling during data acquisition.

### Online Figure

**Online Figure S1.** Resolution of the PAVEI system. (A) PAVEI of the blade-edge. (B) The viscosity-elasticity ratio distribution on the edge and the line spread function (LSF). The full-width-half-maximum (FWHM) is about 65  $\mu\text{m}$ .

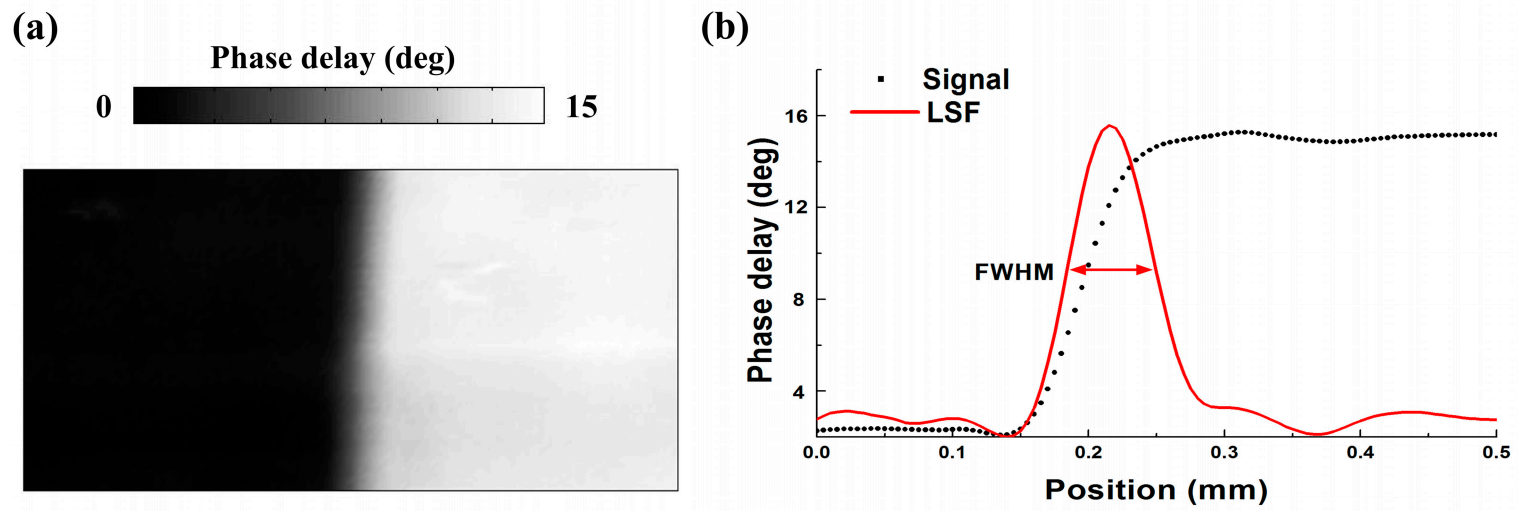

**Online Figure S2.** Amplitude and phase delay of PA signals and noise. (A) Amplitude of PA signal from sample "a", "b", "c" and "d" in a 3 s time window. (B) Amplitude of noise in a 3 s time window. (C) Phase delay of PA signal from sample "a", "b", "c" and "d" in a 3 s time window. (D) Phase delay of noise in a 3 s time window.

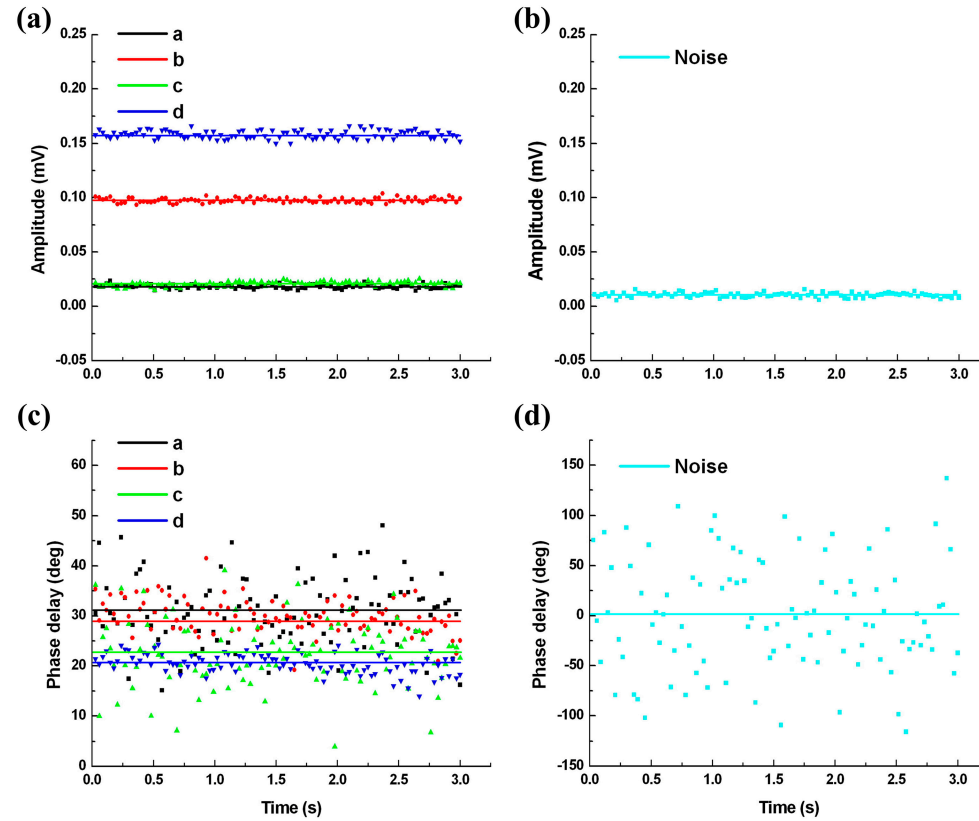

Supplement: s1 [file s1]
